# Supplementary material for: Introns targeted by plant microRNAs: a possible novel mechanism of gene regulation
Source: PubMed Central journal article supplement (PMC4883735; doi:10.1186/1939-8433-6-8), 2013-04-15

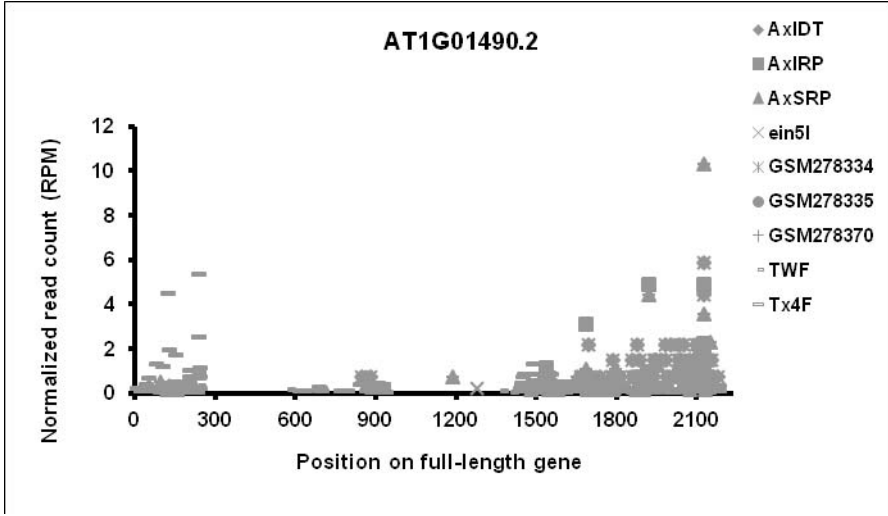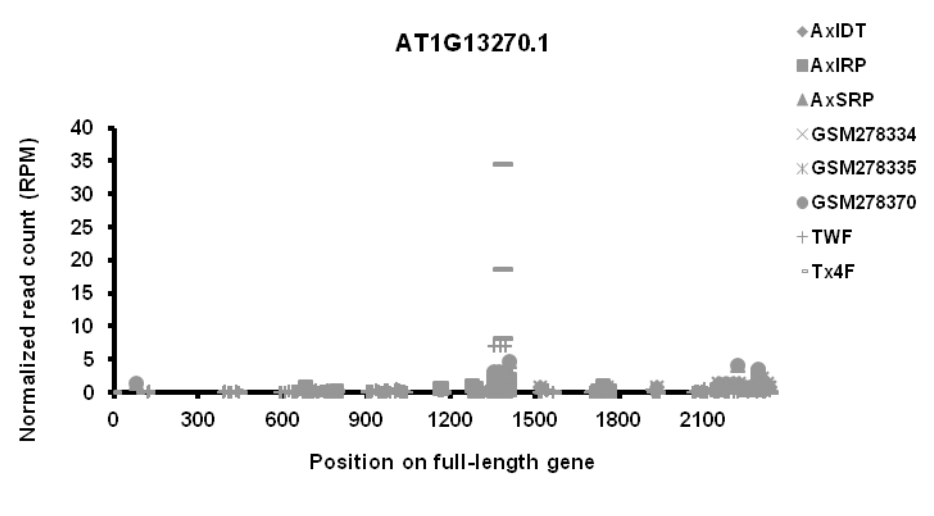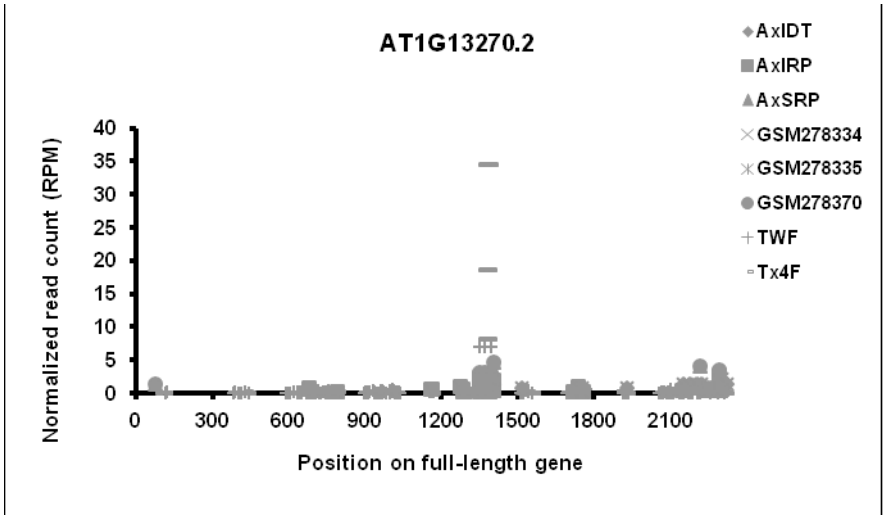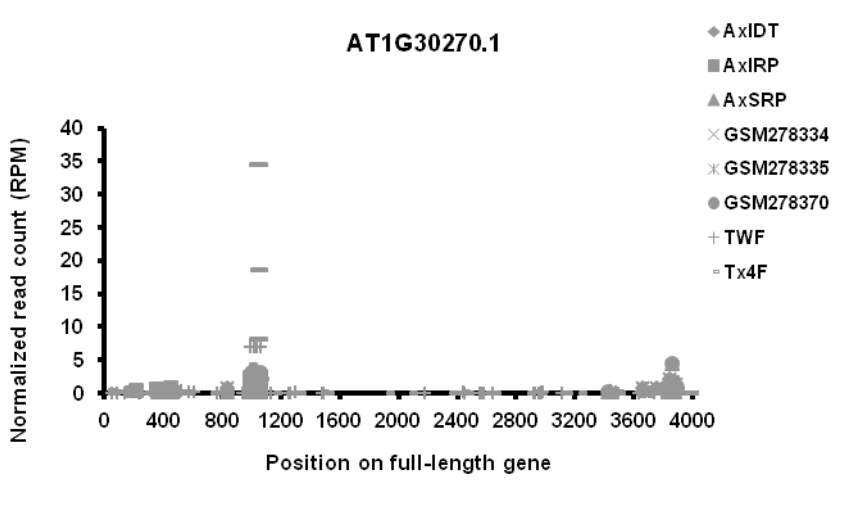

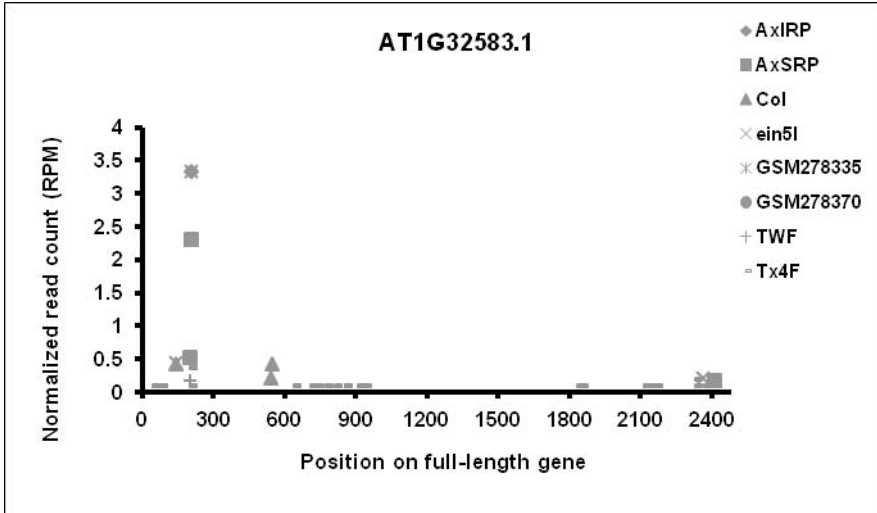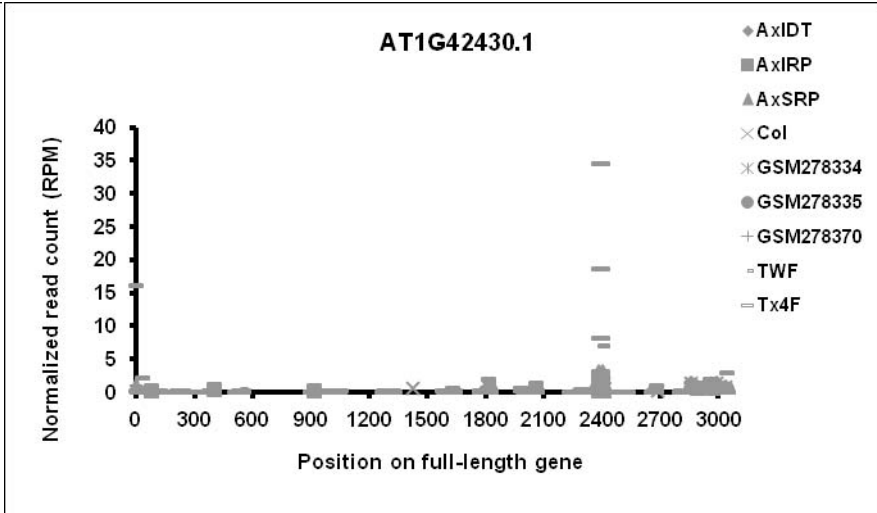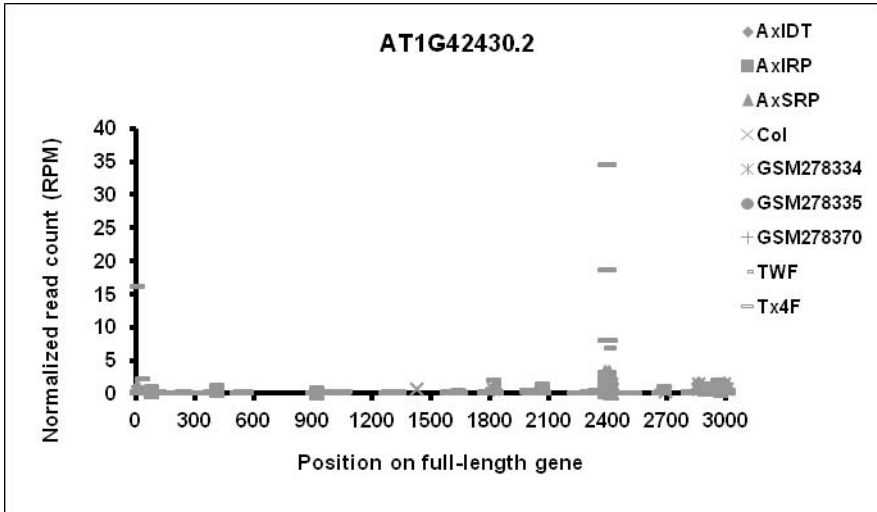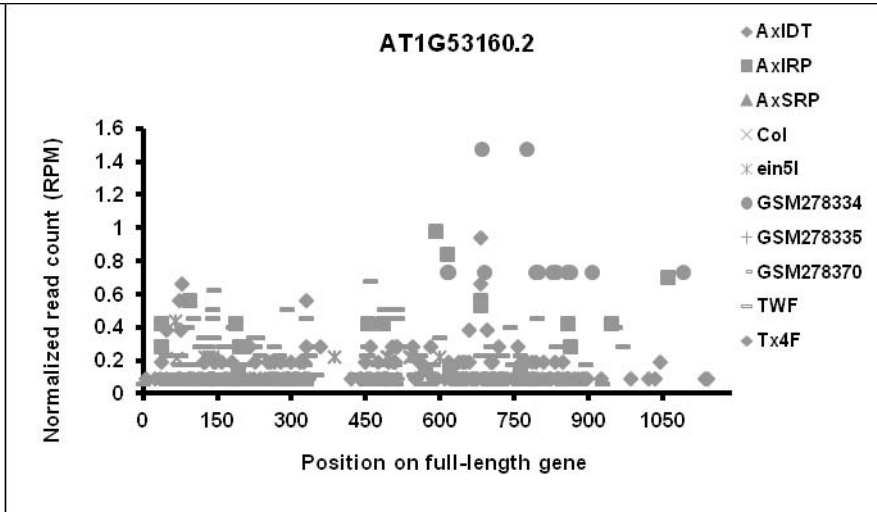

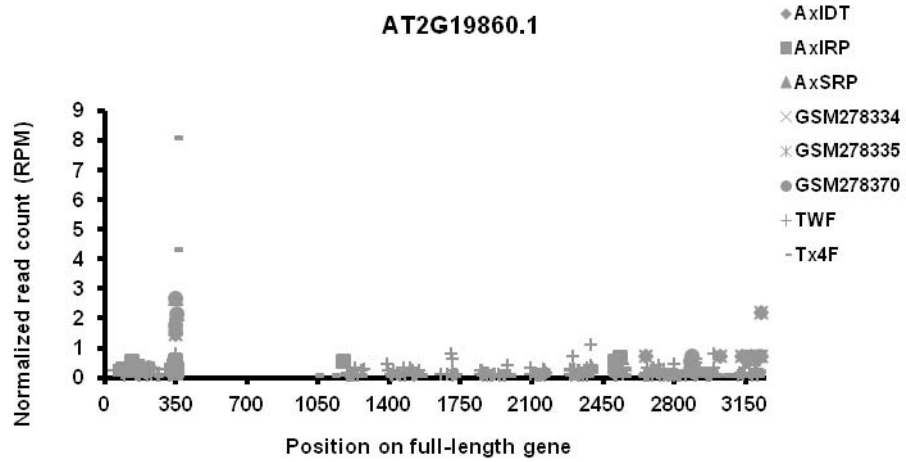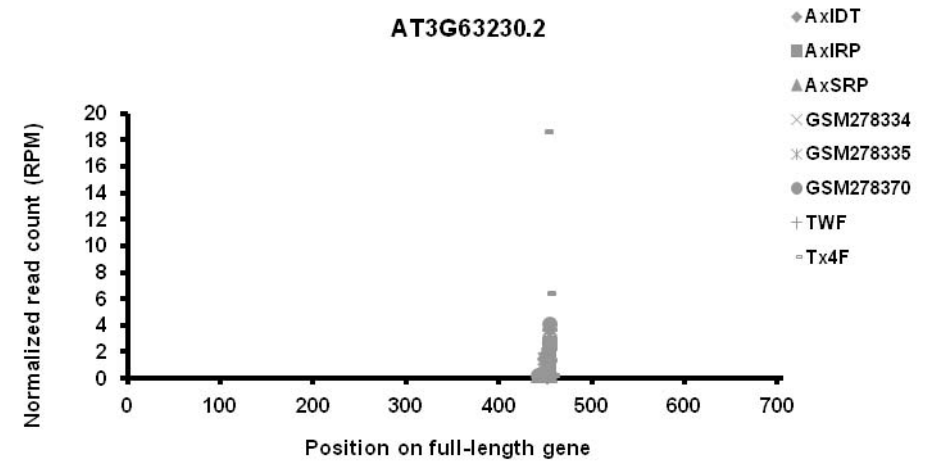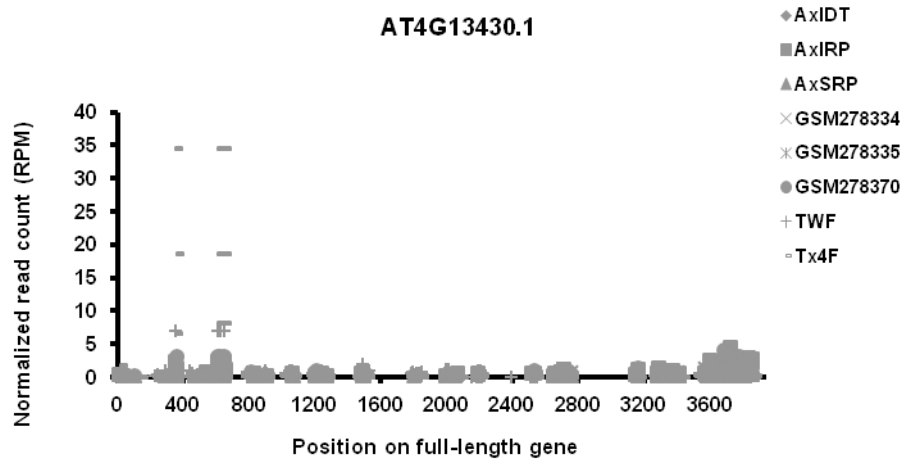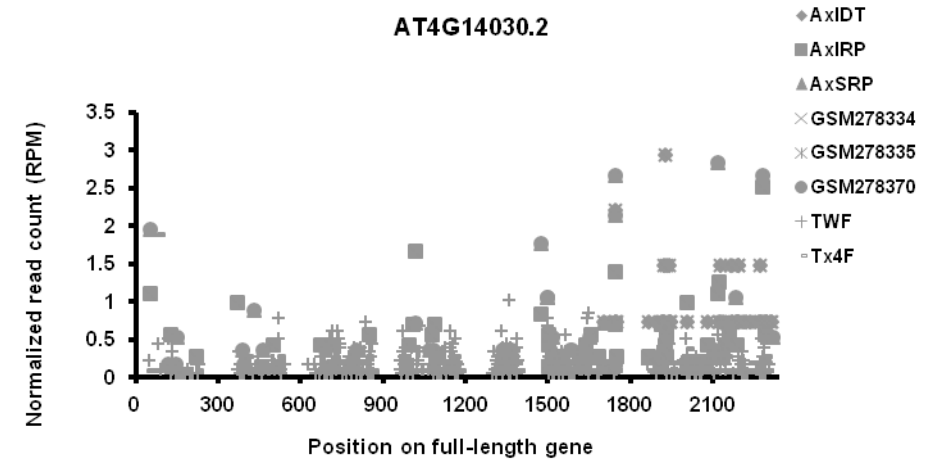

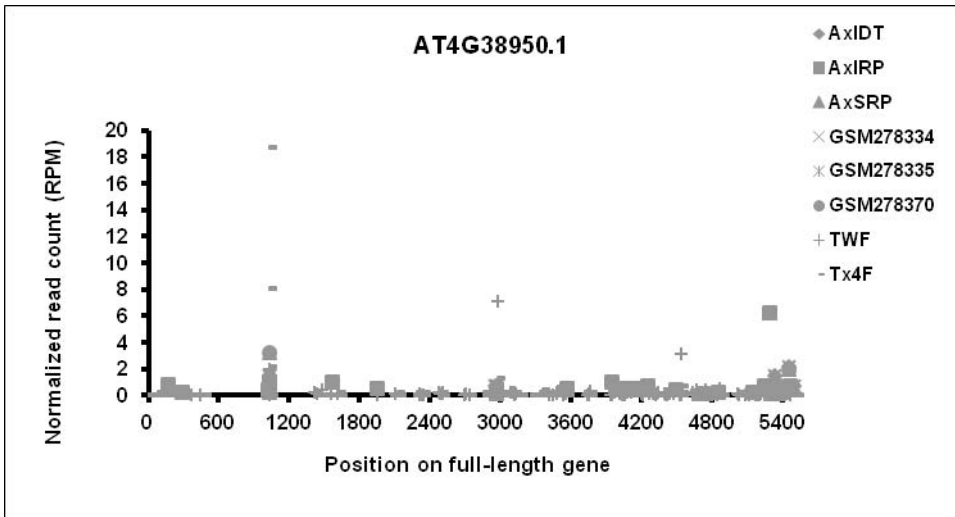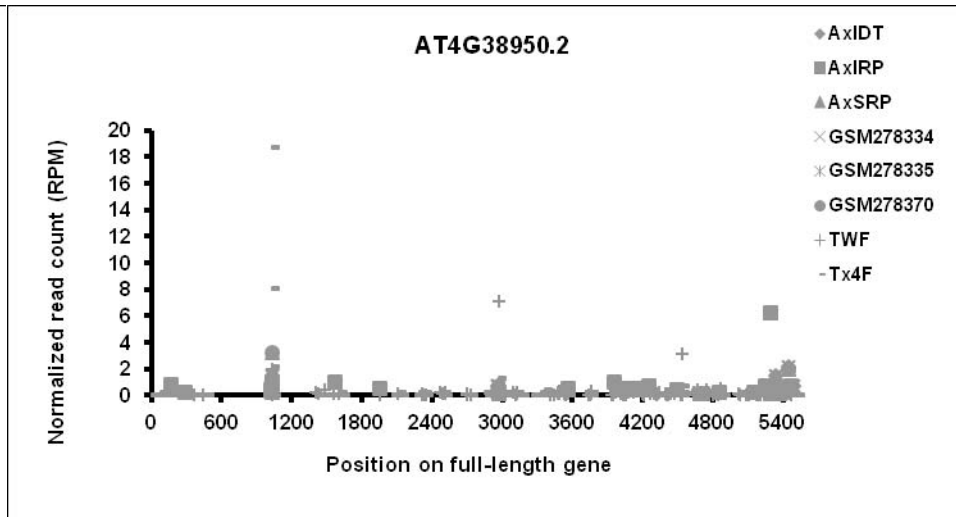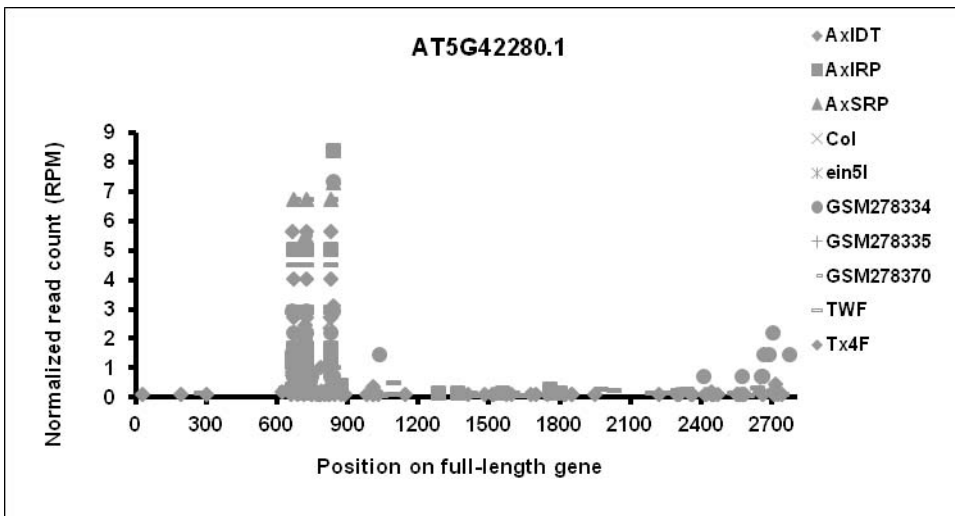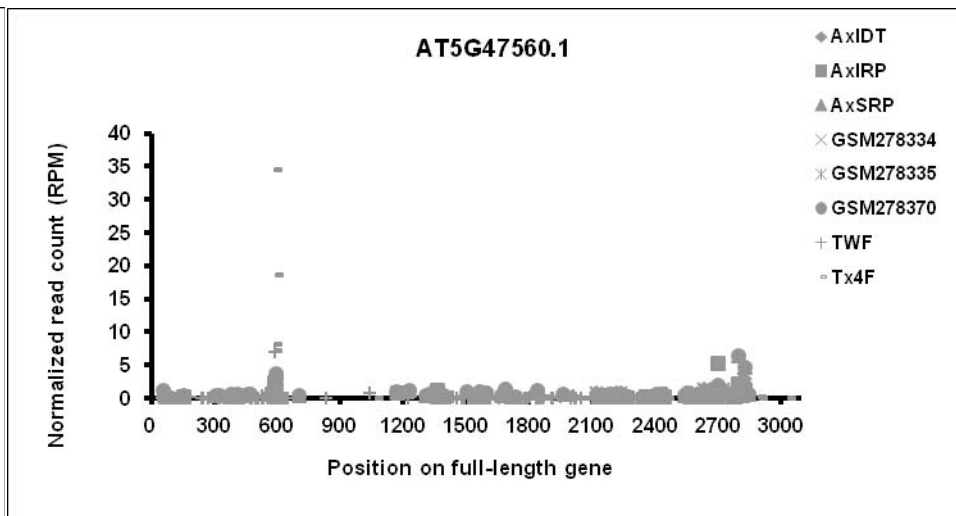

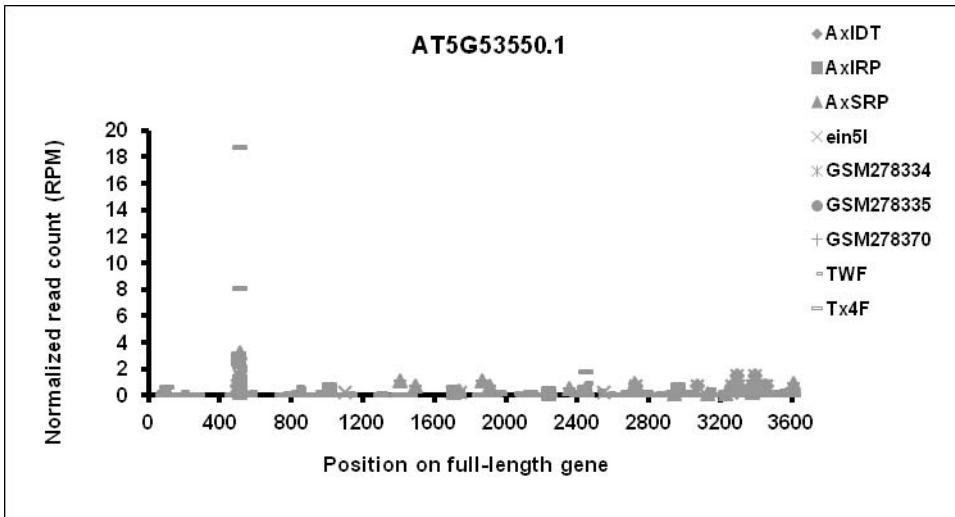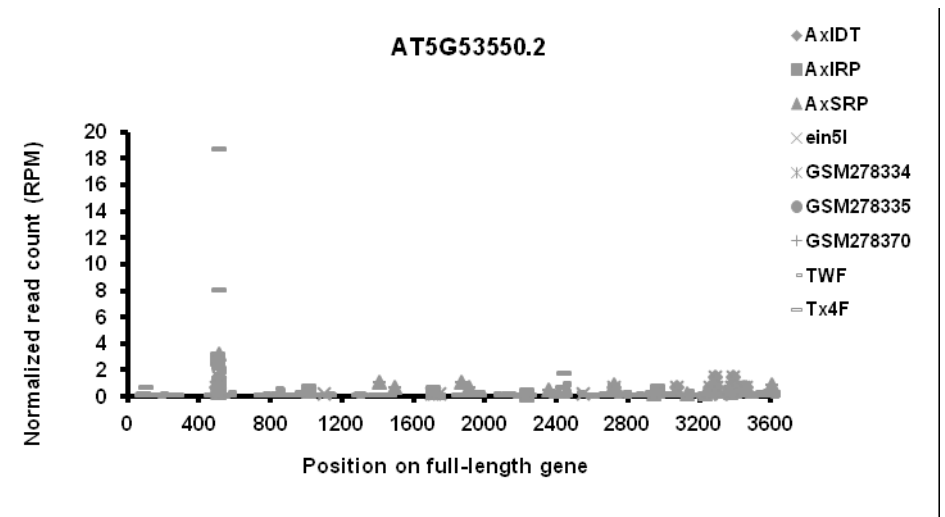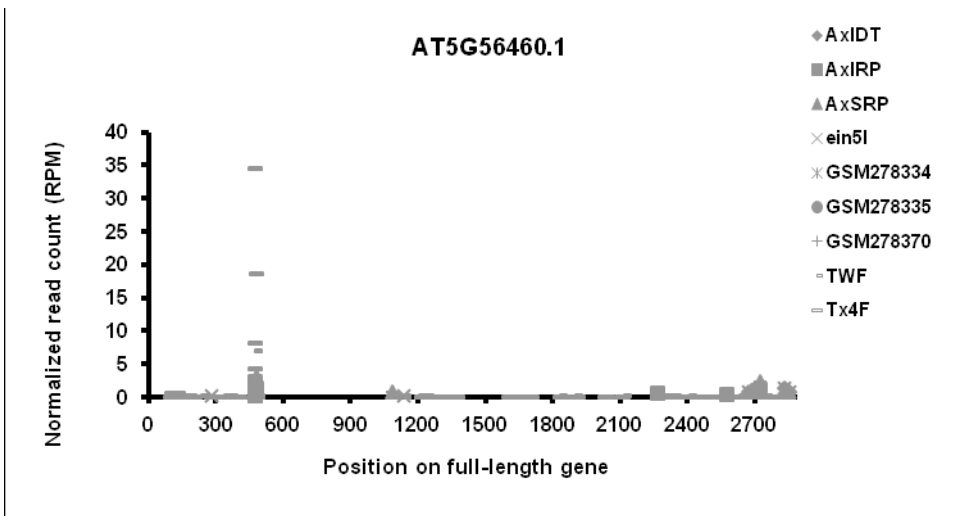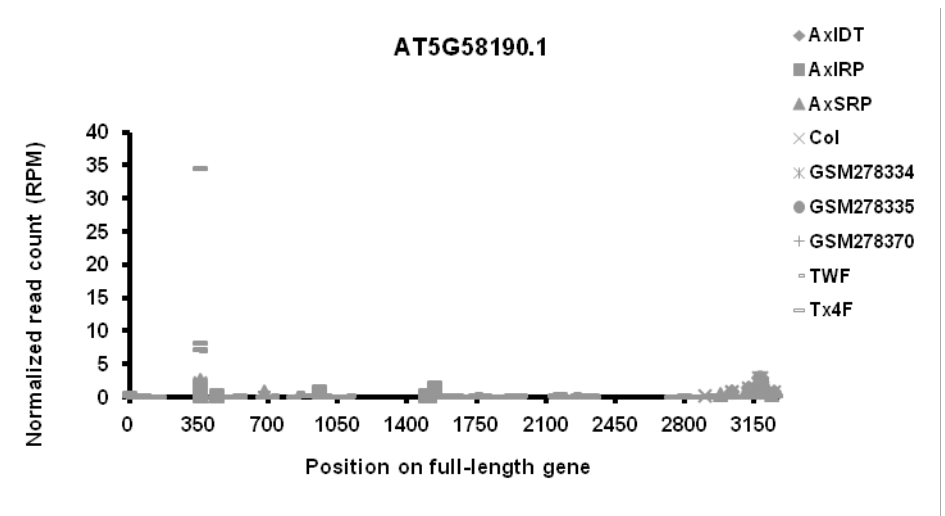

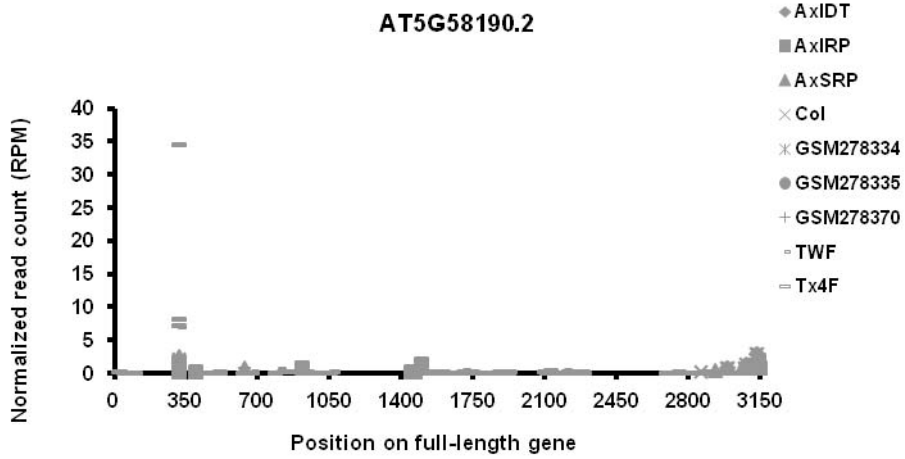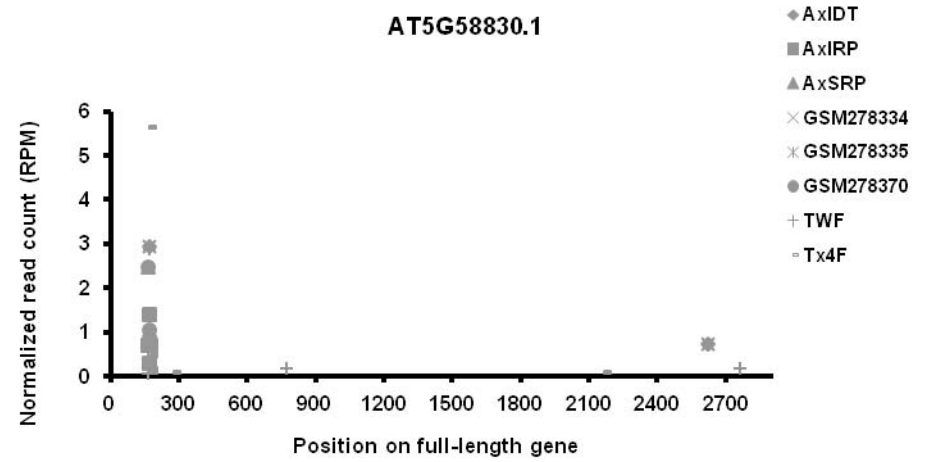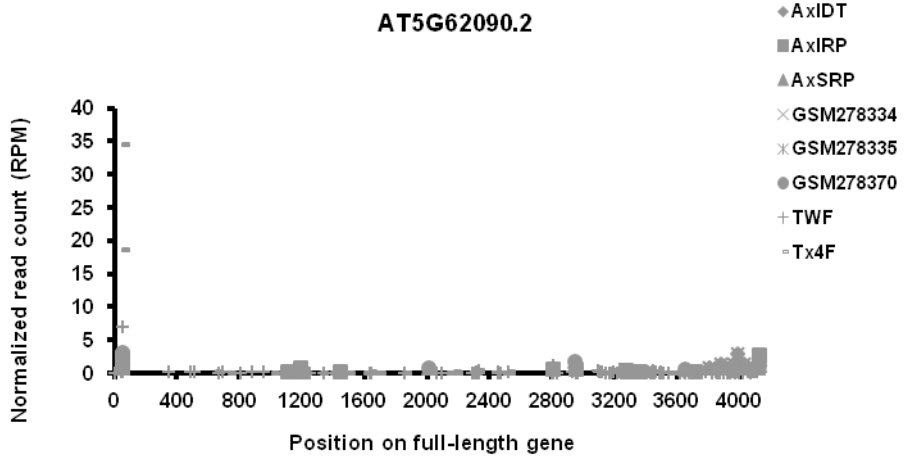

Supplement: 12284_2012_45_MOESM3_ESM.pdf [file 12284_2012_45_MOESM3_ESM.pdf]
