# Supplementary material for: Introns targeted by plant microRNAs: a possible novel mechanism of gene regulation
Source: PubMed Central journal article supplement (PMC4883735; doi:10.1186/1939-8433-6-8), 2013-04-15

LOC\_OS01G07330.3-17

osa-miR2123a/b/c

expressed protein

LOC\_0s01g07330.3

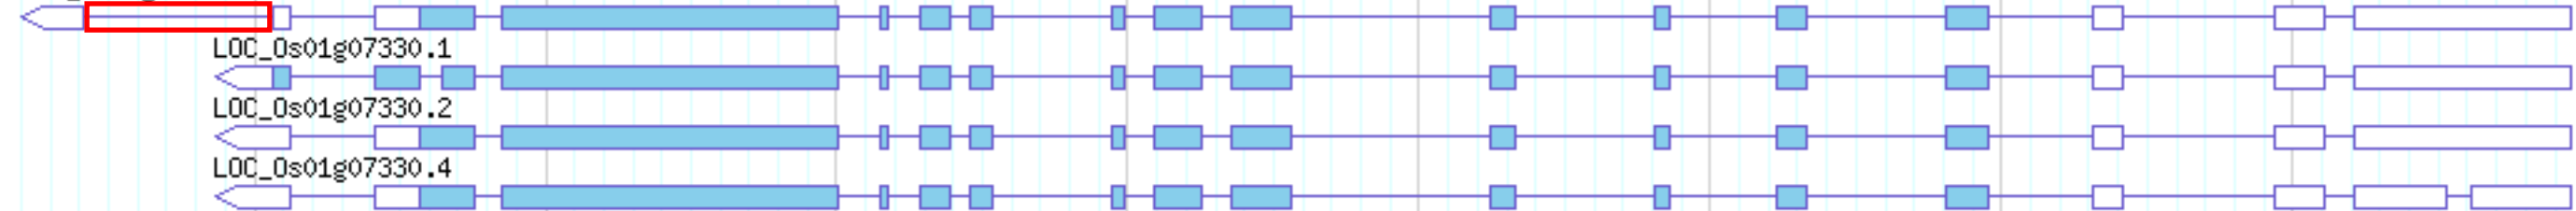

osa-miR2123a/b/c

LOC\_OS04G01530.2-8

adenylate kinase

LOC\_Os04g01530.2

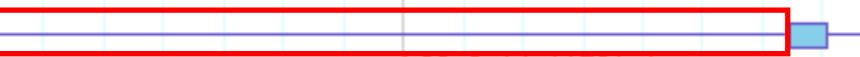

Binding site

LOC\_Os04g01530.1

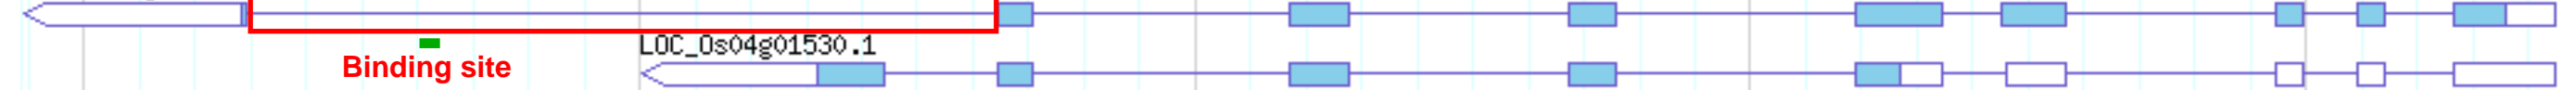

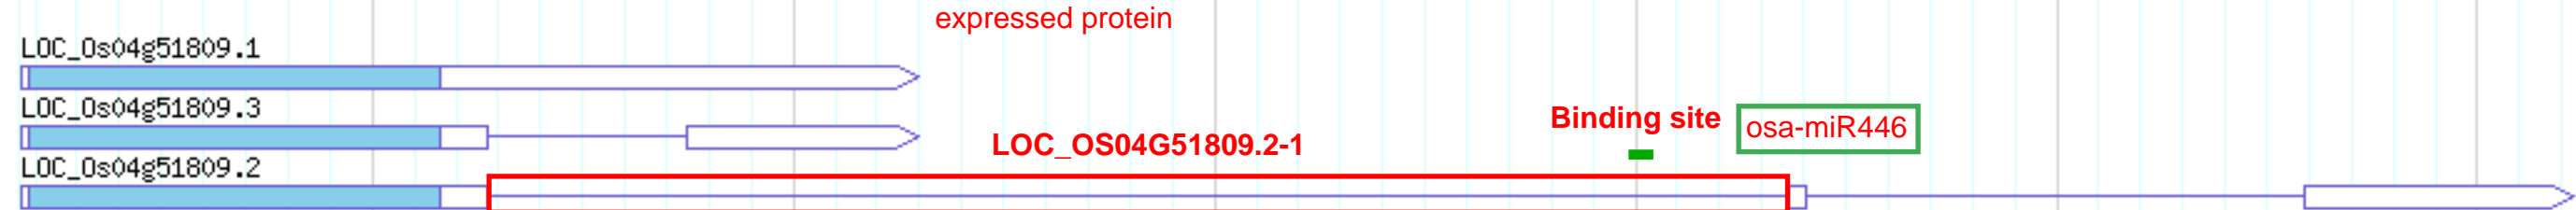

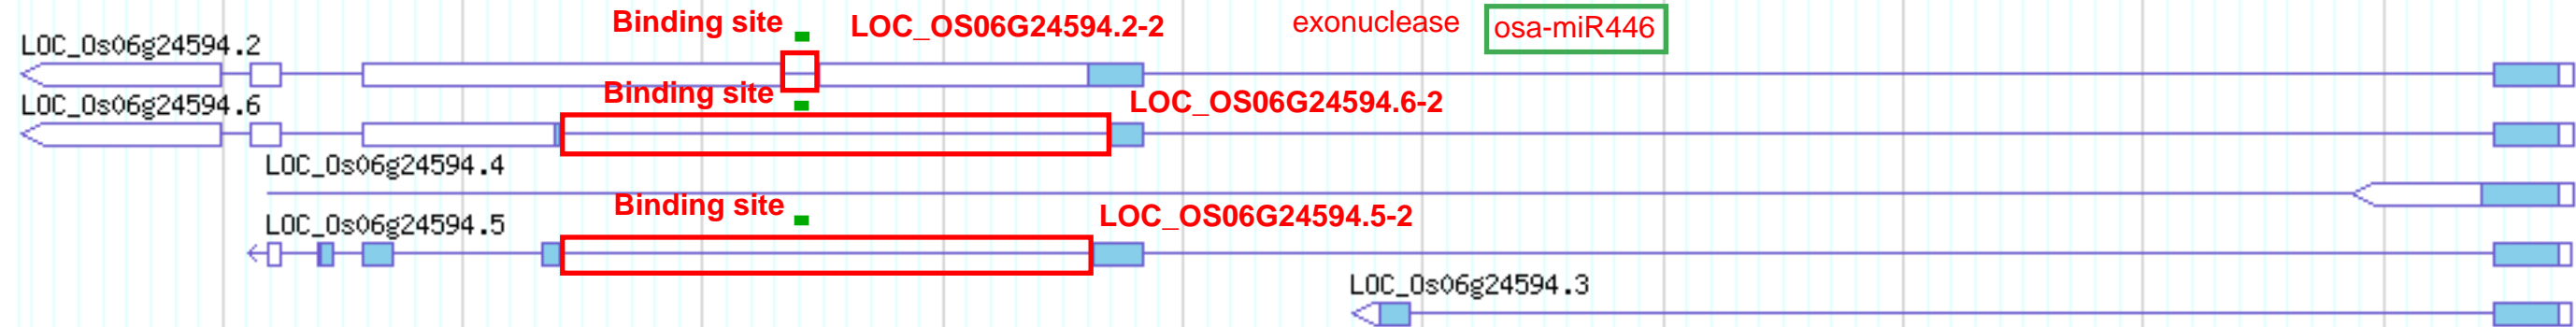



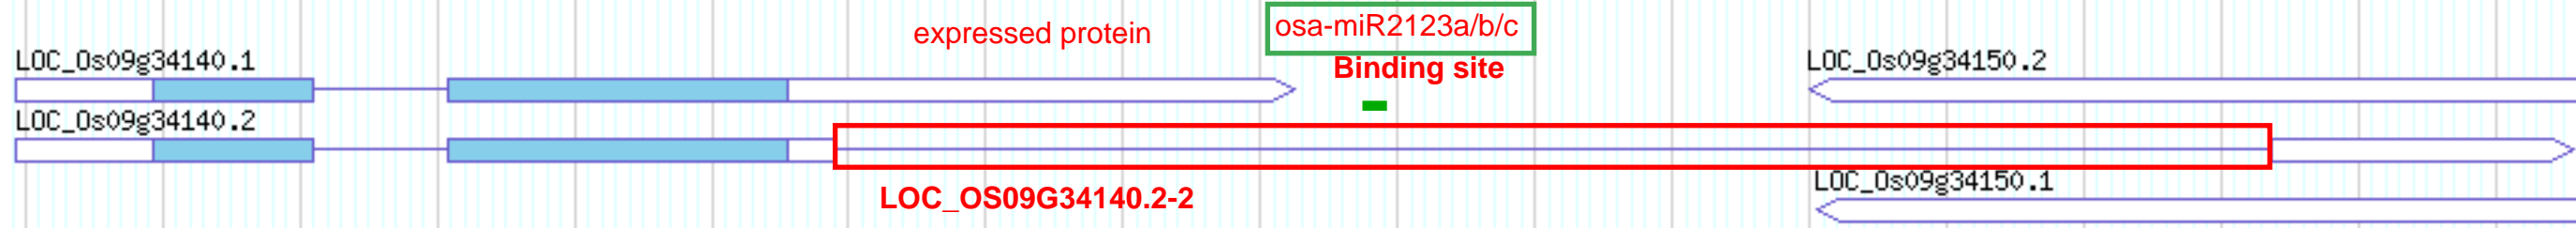

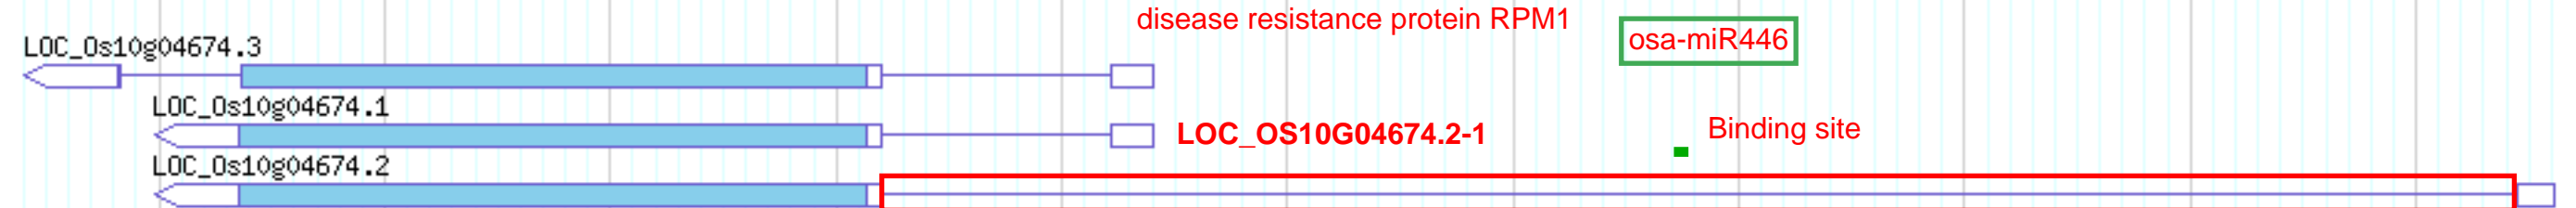

**Binding site**

receptor protein kinase CLAVATA1 precursor

LOC\_0s11g07060.2

**LOC\_OS11G07060.2-1**

**osa-miR2123a/b/c**

LOC\_0s11g07060.1

LOC\_0s11g07060.3

LOC\_0s11g07060.4

LOC\_0s11g07060.5

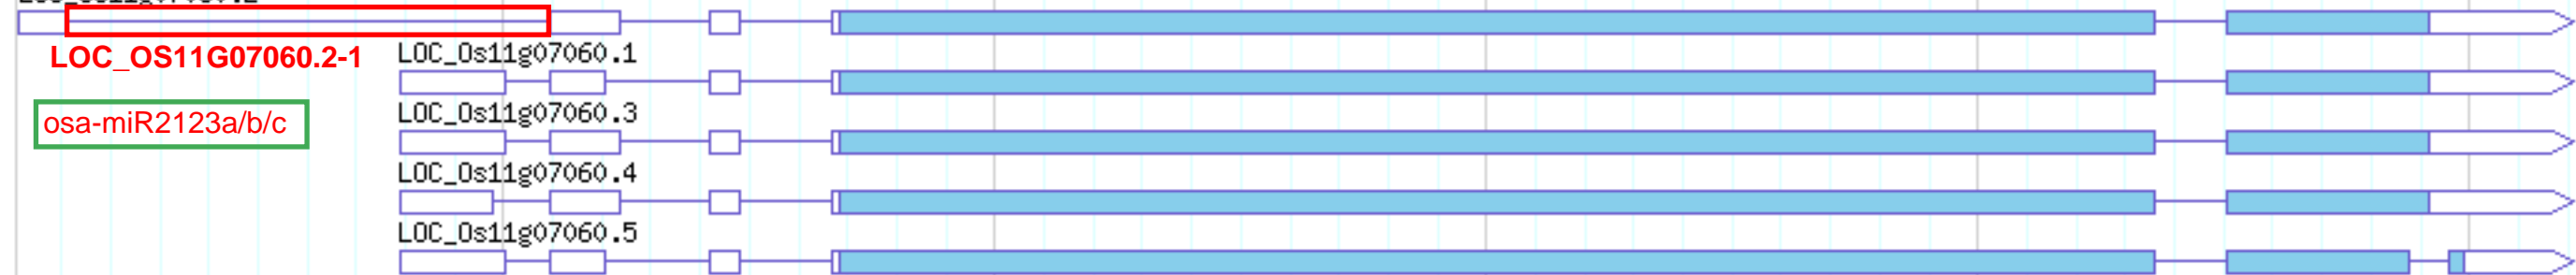



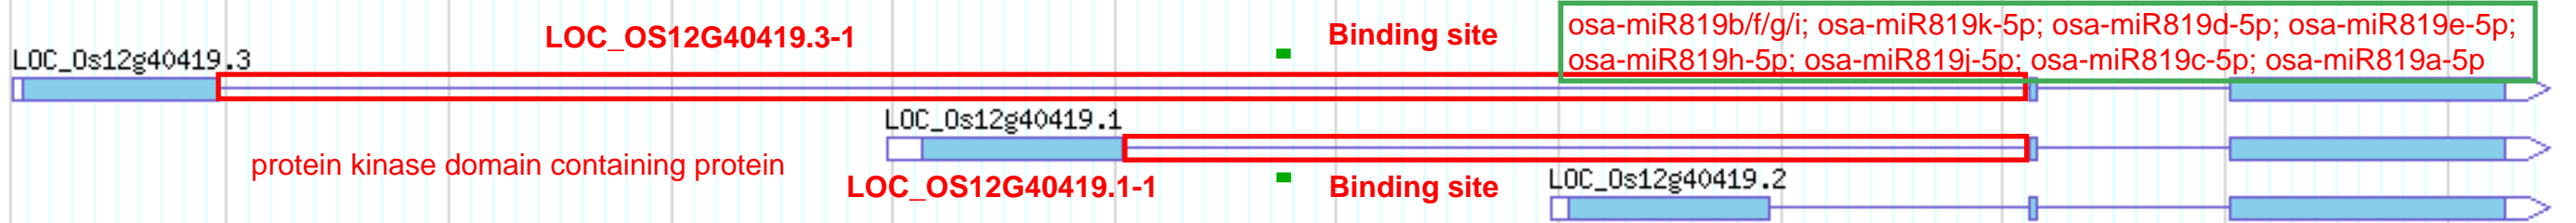

Supplement: 12284_2012_45_MOESM7_ESM.pdf [file 12284_2012_45_MOESM7_ESM.pdf]
